# Supplementary material
Source: PubMed Central journal article supplement (PMC7594401)
Supplement: advancesADV2020002119-suppl1.pdf [file advancesADV2020002119-suppl1.pdf]

## Supplemental Tables

**Table 1** Criteria for dose modifications of RUXOLITINIB due to study drug-related toxicity after Cycle 1 for Phase I and Phase II

| Worst Toxicity<br>CTCAE Grade* unless otherwise specified<br>(Value) | Time point                                                                                                       | Dose Modification Guidelines |                                                                                                                                                                                                                                                                                                                           |
|----------------------------------------------------------------------|------------------------------------------------------------------------------------------------------------------|------------------------------|---------------------------------------------------------------------------------------------------------------------------------------------------------------------------------------------------------------------------------------------------------------------------------------------------------------------------|
| <b>HEMATOLOGICAL TOXICITIES</b>                                      |                                                                                                                  |                              |                                                                                                                                                                                                                                                                                                                           |
| <b>Thrombocytopenia</b>                                              | < 20 x 10 <sup>9</sup> /L                                                                                        | Cycles 2-6                   | No dose modification allowed                                                                                                                                                                                                                                                                                              |
|                                                                      |                                                                                                                  | After cycle 6                | Option to Interrupt study treatment dosing until resolved to ≥ 20 x 10 <sup>9</sup> /L, then restart study treatment at reduced level                                                                                                                                                                                     |
|                                                                      | > 20 x 10 <sup>9</sup> /L + grade 3 bleed                                                                        | Cycles 2-3                   | No dose modification allowed                                                                                                                                                                                                                                                                                              |
|                                                                      |                                                                                                                  | After cycle 3                | Interrupt study treatment dosing until bleeding is resolved and platelet count is at level before bleed was noted, then resume study treatment at reduced level                                                                                                                                                           |
| <b>Neutropenia (ANC)</b>                                             | Grade 4<br>(ANC < 0.5 x 10 <sup>9</sup> /L)                                                                      | Cycles 2-6                   | No dose modification allowed                                                                                                                                                                                                                                                                                              |
|                                                                      |                                                                                                                  | After cycle 6                | Option to interrupt study treatment dosing until resolved to ≤ grade 2, or baseline, then: <ul style="list-style-type: none"> <li>• If resolved within 7 days then restart study treatment at an unchanged dose level</li> <li>• If resolved in more than 7 days then restart study treatment at reduced level</li> </ul> |
|                                                                      | Febrile neutropenia<br>(ANC < 1.0 x 10 <sup>9</sup> /L,<br>fever ≥ 38.5°C)                                       | Cycles 2-3                   | No dose modification allowed                                                                                                                                                                                                                                                                                              |
|                                                                      |                                                                                                                  | After cycle 3                | Interrupt study treatment dosing until fever resolved and ANC ≤ grade 2, then restart study treatment at reduced level                                                                                                                                                                                                    |
| <b>Anemia</b><br>only requires dose reductions after cycle 6         | Doubling of transfusion frequency from baseline <sup>#</sup> or requiring 2 units per week x 4 consecutive weeks | Cycles 2-6                   | No dose modification allowed                                                                                                                                                                                                                                                                                              |
|                                                                      |                                                                                                                  | After Cycle 6                | Interrupt study treatment, if hemoglobin (or transfusion frequency) returns to baseline within 28 days restart ruxolitinib at same dose, if this recurs again then reduce dose                                                                                                                                            |

| Worst Toxicity<br>CTCAE Grade* unless otherwise specified<br>(Value)                                       | Time point                                                                                                                 | Dose Modification Guidelines |                                                                                                                            |
|------------------------------------------------------------------------------------------------------------|----------------------------------------------------------------------------------------------------------------------------|------------------------------|----------------------------------------------------------------------------------------------------------------------------|
| <b>NON-HEMATOLOGICAL TOXICITIES</b>                                                                        |                                                                                                                            |                              |                                                                                                                            |
| <b>GASTROINTESTINAL</b>                                                                                    |                                                                                                                            |                              |                                                                                                                            |
| <b>Diarrhea</b>                                                                                            | Grade 2 (4-6 stools/day over baseline, etc.) despite the use of optimal antidiarrheal medications                          | Cycles 2-3                   | No dose modification allowed                                                                                               |
|                                                                                                            |                                                                                                                            | After Cycle 3                | Hold ruxolitinib dosing until resolved to ≤ grade 1, or baseline, then restart at unchanged dose level                     |
|                                                                                                            | Grade 3 (≥ 7 stools/day over baseline, etc.) despite the use of optimal antidiarrheal medications                          | Cycles 2-3                   | No dose modification allowed                                                                                               |
|                                                                                                            |                                                                                                                            | After Cycle 3                | Hold ruxolitinib dosing until resolved to ≤ grade 1, or baseline, then restart study treatment at reduced level            |
|                                                                                                            | Grade 4 (life-threatening consequences, hemodynamic collapse, etc.) despite the use of optimal antidiarrheal medications   | After Cycle 1                | Permanently discontinue study treatment dosing                                                                             |
|                                                                                                            |                                                                                                                            | <b>Vomiting/Nausea**</b>     | Grade 1 & 2 not requiring treatment or controlled using standard anti-emetics                                              |
| After Cycle 3                                                                                              | Interrupt study treatment dosing until resolved to ≤ grade 1, or baseline, then restart study treatment at same dose level |                              |                                                                                                                            |
| Grade 3 or 4 vomiting or Grade 3 nausea that cannot be controlled despite the use of standard anti-emetics | Cycles 2-3                                                                                                                 |                              | Interrupt study treatment dosing until resolved to ≤ grade 1, or baseline, then restart study treatment at same dose level |
|                                                                                                            | After Cycle 3                                                                                                              |                              | Interrupt study treatment dosing until resolved to ≤ grade 1, or baseline, then restart study treatment at reduced level   |

| Worst Toxicity<br>CTCAE Grade* unless otherwise specified<br>(Value) |              | Time point                                                                                                                                                                                                                                                                                                                                                     | Dose Modification Guidelines                                                                                                                                                                                                                                                                                                                                                        |
|----------------------------------------------------------------------|--------------|----------------------------------------------------------------------------------------------------------------------------------------------------------------------------------------------------------------------------------------------------------------------------------------------------------------------------------------------------------------|-------------------------------------------------------------------------------------------------------------------------------------------------------------------------------------------------------------------------------------------------------------------------------------------------------------------------------------------------------------------------------------|
| <b>HEPATIC</b>                                                       |              |                                                                                                                                                                                                                                                                                                                                                                |                                                                                                                                                                                                                                                                                                                                                                                     |
| <b>Total Bilirubin</b>                                               | Grade 3 or 4 | Cycles 2-3                                                                                                                                                                                                                                                                                                                                                     | Interrupt study treatment dosing until resolved to $\leq$ grade 1, or baseline, then restart study treatment at same dose level                                                                                                                                                                                                                                                     |
|                                                                      |              | After Cycle 3                                                                                                                                                                                                                                                                                                                                                  | Interrupt study treatment dosing until resolved to $\leq$ grade 2, or baseline, then restart study treatment at reduced level                                                                                                                                                                                                                                                       |
|                                                                      |              | <b>Note:</b> If Grade 3 or Grade 4 hyperbilirubinemia is due to the indirect component only, and hemolysis as the etiology has been ruled out as per institutional guidelines (e.g., review of peripheral blood smear and haptoglobin determination), then reduction of one dose level and continuation of treatment is at the discretion of the Investigator. |                                                                                                                                                                                                                                                                                                                                                                                     |
| <b>AST/SGOT,<br/>ALT/SGPT</b>                                        | > 5-10 x ULN | After Cycle 1                                                                                                                                                                                                                                                                                                                                                  | Interrupt study treatment dosing until resolved to $\leq$ grade 1 (or $\leq$ grade 2 if liver infiltration with tumor is present), or baseline, then: <ul style="list-style-type: none"> <li>• If resolved within 7 days, then restart study treatment at unchanged dose level</li> <li>• If resolved in more than 7 days, then restart study treatment at reduced level</li> </ul> |
|                                                                      | > 10 x ULN   | After Cycle 1                                                                                                                                                                                                                                                                                                                                                  | Interrupt study treatment dosing until resolved to $\leq$ grade 1, or baseline, then: <ul style="list-style-type: none"> <li>• restart study treatment at reduced level</li> </ul>                                                                                                                                                                                                  |
|                                                                      |              | <b>Note:</b> All dose modifications should be based on the worst preceding toxicity.                                                                                                                                                                                                                                                                           |                                                                                                                                                                                                                                                                                                                                                                                     |

# Only applies to patients requiring at least 2 units of packed red blood cells every three weeks at baseline

\* Common Terminology Criteria for Adverse Events (CTCAE Version 4.0)

\*\* See also concomitant medication section

**Table 2 Criteria for dose modifications (treatment delays and interruptions) of Decitabine due to study drug-related toxicity after Cycle 1 for Phase I and Phase II**

| Worst Toxicity<br>CTCAE Grade* unless otherwise specified<br>(Value) | Time Point                                                                 | Dose Modification Guidelines |                                                                                                                                                                                                      |
|----------------------------------------------------------------------|----------------------------------------------------------------------------|------------------------------|------------------------------------------------------------------------------------------------------------------------------------------------------------------------------------------------------|
| <b>HEMATOLOGICAL TOXICITIES</b>                                      |                                                                            |                              |                                                                                                                                                                                                      |
| <b>Thrombocytopenia</b>                                              | < 20 x 10 <sup>9</sup> /L                                                  | Cycles 2-6                   | No dose delay or interruption required                                                                                                                                                               |
|                                                                      |                                                                            | After Cycle 6                | Option to delay Decitabine dosing until resolved to ≥ 20 x 10 <sup>9</sup> /L, then restart study treatment                                                                                          |
|                                                                      | > 20 x 10 <sup>9</sup> /L + grade 3 bleed                                  | Cycles 2-3                   | No dose delay or interruption required                                                                                                                                                               |
|                                                                      |                                                                            | After Cycle 3                | Interrupt and/or delay Decitabine dosing until bleeding is resolved and platelet count is at level before bleed was noted, then resume study treatment                                               |
| <b>Neutropenia (ANC)</b>                                             | Grade 4<br>(ANC < 0.5 x 10 <sup>9</sup> /L)                                | After Cycle 1                | No dose delay or interruption required                                                                                                                                                               |
|                                                                      | Febrile neutropenia<br>(ANC < 1.0 x 10 <sup>9</sup> /L,<br>fever ≥ 38.5°C) | Cycles 2-3                   | No dose delay or interruption required                                                                                                                                                               |
|                                                                      |                                                                            | After Cycle 3                | Option to interrupt and/or delay Decitabine dosing until source of infection identified and treatment initiated then restart study treatment. If fever is determined due to MPN, continue treatment. |

| Worst Toxicity<br>CTCAE Grade* unless otherwise specified<br>(Value) | Time Point                                                                                                               | Dose Modification Guidelines |                                                                                                                      |
|----------------------------------------------------------------------|--------------------------------------------------------------------------------------------------------------------------|------------------------------|----------------------------------------------------------------------------------------------------------------------|
| <b>NON-HEMATOLOGICAL TOXICITIES</b>                                  |                                                                                                                          |                              |                                                                                                                      |
| <b>GASTROINTESTINAL</b>                                              |                                                                                                                          |                              |                                                                                                                      |
| <b>Diarrhea</b>                                                      | Grade 3 ( $\geq 7$ stools/day over baseline, etc.) despite the use of optimal antidiarrheal medications                  | After Cycle 1                | Interrupt and/or delay Decitabine dosing until resolved to $\leq$ grade 1, or baseline, then restart study treatment |
|                                                                      | Grade 4 (life-threatening consequences, hemodynamic collapse, etc.) despite the use of optimal antidiarrheal medications | After Cycle 1                | Permanently discontinue study treatment dosing                                                                       |
| <b>Vomiting/Nausea***</b>                                            | Grade 1 & 2 not requiring treatment <b>or</b> controlled using standard anti-emetics                                     | After Cycle 1                | No dose delay or interruption required                                                                               |
|                                                                      | Grade 3 or 4 vomiting or Grade 3 nausea that cannot be controlled despite the use of standard anti-emetics               | After Cycle 1                | Interrupt and/or delay Decitabine dosing until resolved to $\leq$ grade 1, or baseline, then restart study treatment |

| Worst Toxicity<br>CTCAE Grade* unless otherwise specified<br>(Value)                                                                                                                                                                                                                                                                                              |              | Time Point    | Dose Modification Guidelines                                                                                                                                                   |
|-------------------------------------------------------------------------------------------------------------------------------------------------------------------------------------------------------------------------------------------------------------------------------------------------------------------------------------------------------------------|--------------|---------------|--------------------------------------------------------------------------------------------------------------------------------------------------------------------------------|
| <b>HEPATIC</b>                                                                                                                                                                                                                                                                                                                                                    |              |               |                                                                                                                                                                                |
| <b>Total Bilirubin</b>                                                                                                                                                                                                                                                                                                                                            | Grade 3 or 4 | Cycles 2-3    | Interrupt and/or delay Decitabine dosing until resolved to $\leq$ grade 2, or baseline, then restart study treatment                                                           |
|                                                                                                                                                                                                                                                                                                                                                                   |              | After Cycle 3 | Interrupt and/or delay Decitabine dosing until resolved to $\leq$ grade 2, or baseline, then restart study treatment at 20% dose reduction                                     |
| <b>Note:</b> If Grade 3 or Grade 4 hyperbilirubinemia is due to the indirect component only, and hemolysis as the etiology has been ruled out as per institutional guidelines (e.g., review of peripheral blood smear and haptoglobin determination), continuation of treatment is at the discretion of the Investigator at a 20% reduction in Decitabine dosing. |              |               |                                                                                                                                                                                |
| <b>AST/SGOT,<br/>ALT/SGPT</b>                                                                                                                                                                                                                                                                                                                                     | > 5-10 x ULN | After Cycle 1 | Interrupt and/or delay Decitabine dosing until resolved to $\leq$ grade 1 (or $\leq$ grade 2 if liver infiltration with tumor is present), or baseline, then restart treatment |
|                                                                                                                                                                                                                                                                                                                                                                   |              | Cycles 2-3    | Interrupt and/or delay Decitabine dosing until resolved to $\leq$ grade 1, or baseline, then restart treatment                                                                 |
|                                                                                                                                                                                                                                                                                                                                                                   | > 10 x ULN   | After Cycle 3 | Interrupt and/or delay Decitabine dosing until resolved to $\leq$ grade 1, or baseline, then restart at 20% dose reduction                                                     |
| <b>Note:</b> All dose modifications should be based on the worst preceding toxicity.                                                                                                                                                                                                                                                                              |              |               |                                                                                                                                                                                |

\* Common Terminology Criteria for Adverse Events (CTCAE Version 4.0)

\*\*\* See also concomitant medication section

## **Supplemental Figure Legends**

**Supplemental Figure 1 A) Heatmap of evaluated cytokines for MPN-AP/BP baseline and MF controls.** Each row constitutes one cytokine, with the data for individual patients organized in columns. Green and red denote markers that are present at lower and higher levels, respectively.

**B) Log<sub>2</sub> fold changes shown for evaluated cytokines.** Comparisons consisted of baseline MPN-AP/BP versus MF controls.

# Supplemental Figure 1

## A

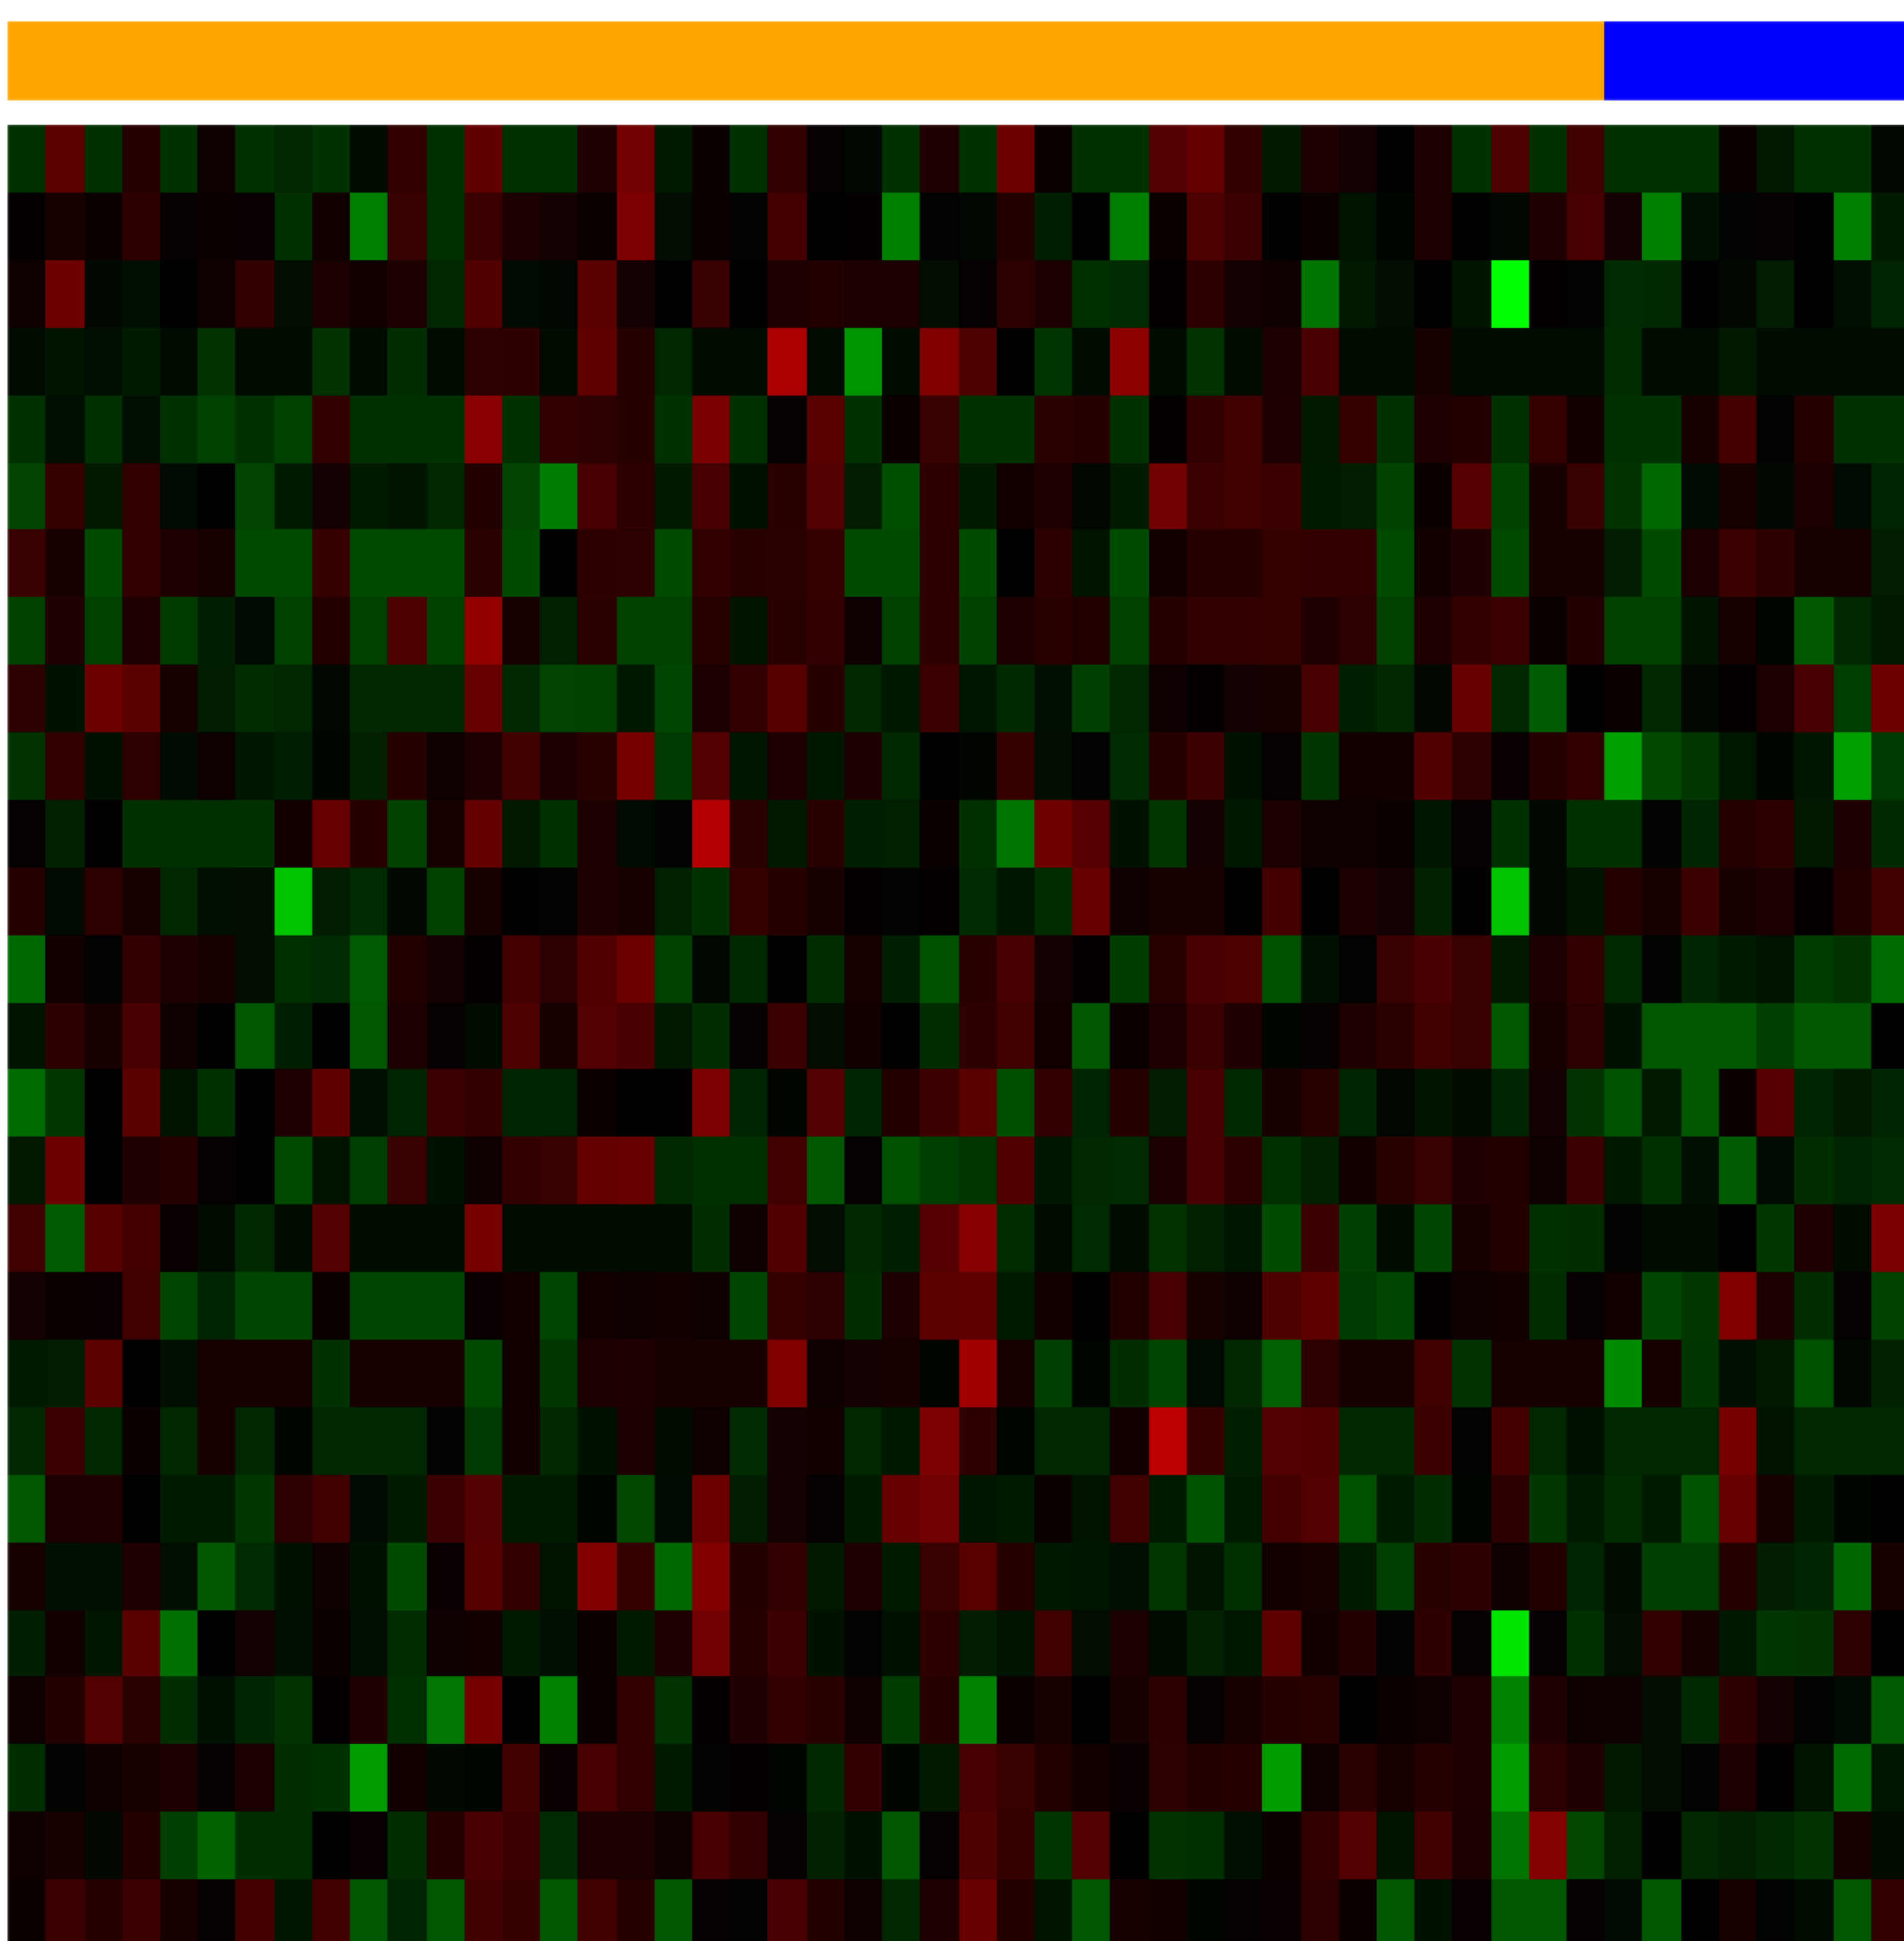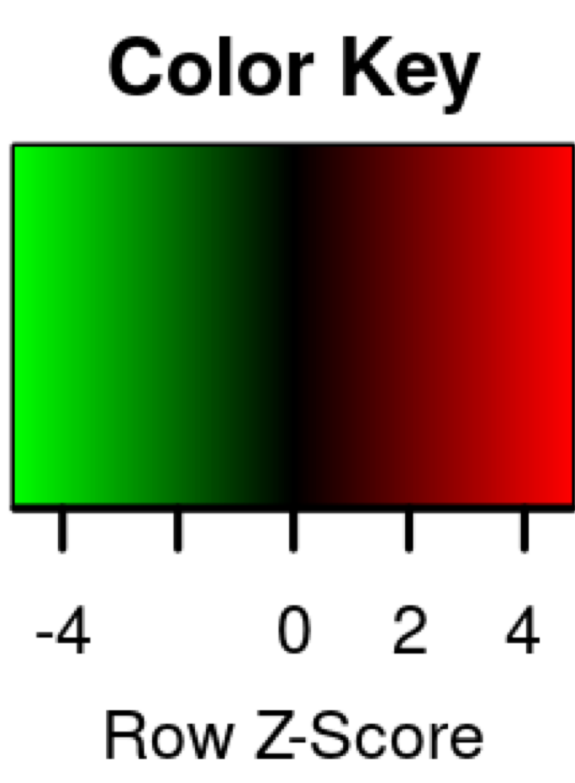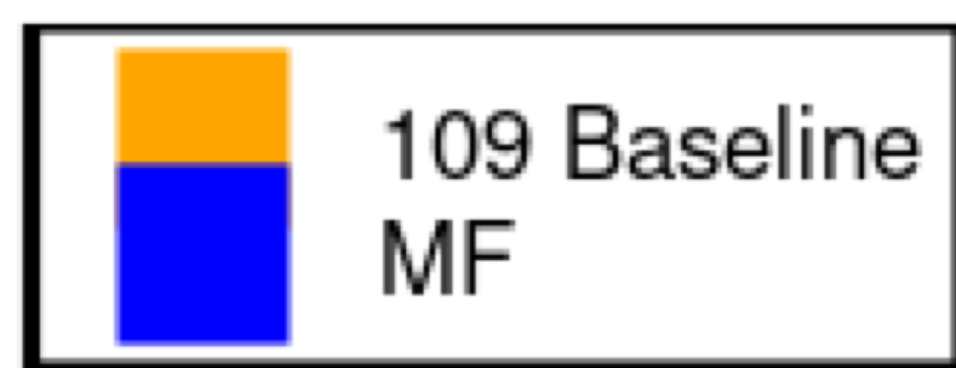

## B

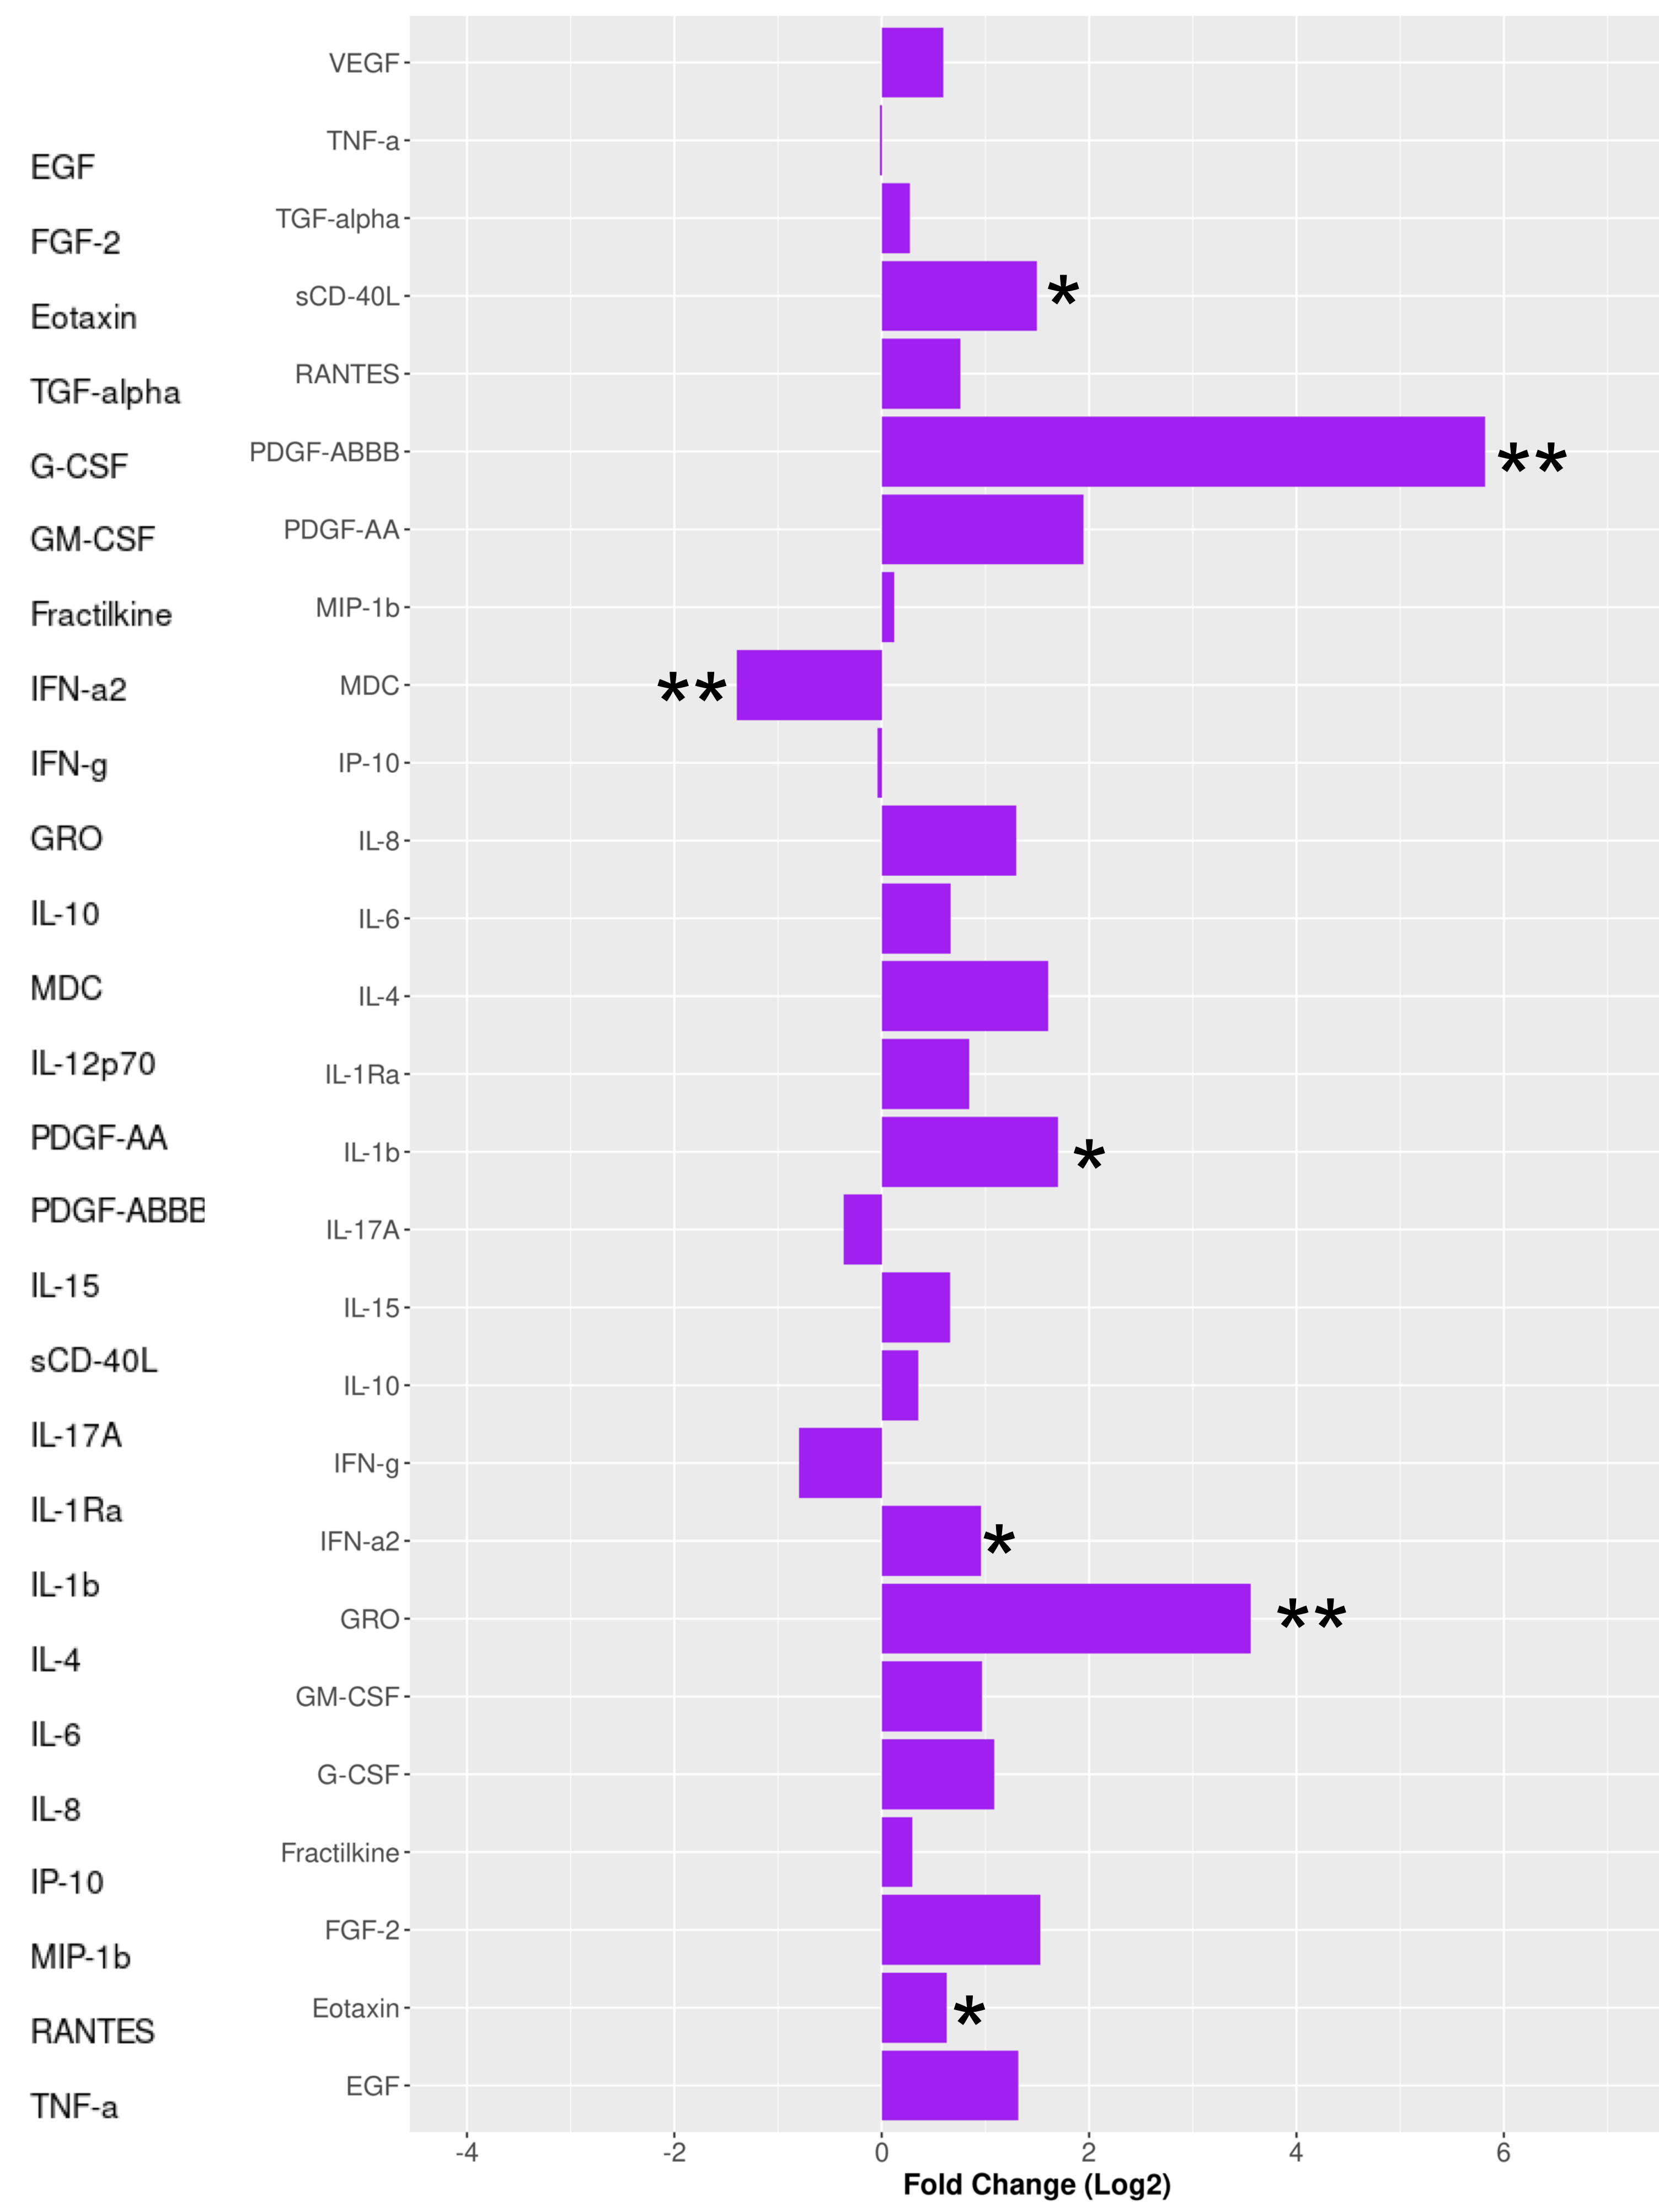

\* p < 0.05  
\*\* p < 0.01
